# Supplementary material for: Tumor-associated B-cells induce tumor heterogeneity and therapy resistance
Source: PubMed Central journal article supplement (PMC5605714; doi:10.1038/s41467-017-00452-4), 2017-09-19
Supplement: 41467_2017_452_MOESM1_ESM.pdf [file 41467_2017_452_MOESM1_ESM.pdf]

### **Description of Supplementary Files**

File Name: Supplementary Information

Description: Supplementary Figures and Supplementary Tables

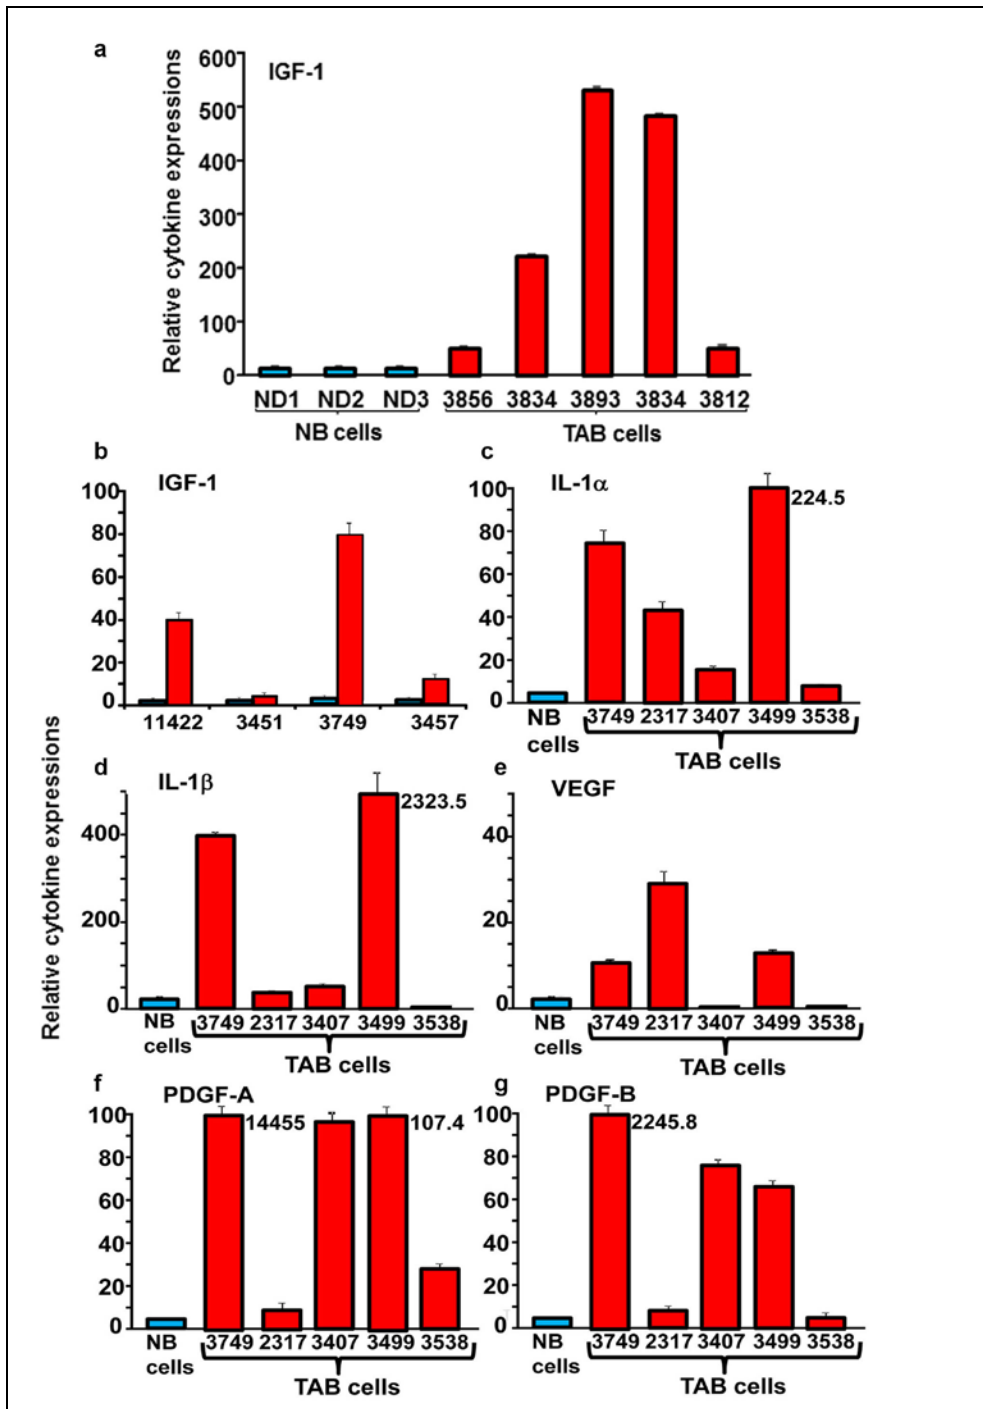

**Supplementary Figure 1. Increased inflammatory cytokine mRNA transcript expression in tumor-associated B (TAB) cells.** (a) Fresh TAB-cells directly isolated from patients' melanoma tissues (TAB cells; red bars) show increased expression of IGF-1 when compared to fresh NB-cells from peripheral blood (blue bars). (b) Immortalized TAB-cells from melanoma tissues (TAB cells; red bars) show increased expression

of IGF-1 when compared to immortalized NB-cells from same patients' peripheral blood (**blue bars**). (**c-g**) Immortalized B-cells from melanoma tissues (**TAB cells; red bars**) show increased expression of IL-1 $\alpha$  (**c**), IL-1 $\beta$  (**d**), VEGF (**e**), PDGF-A (**f**) and PDGF-B (**g**) when compared to immortalized NB cells from healthy volunteers (**blue bars**). mRNA transcripts were determined by real time qPCR as in Fig. 1D with levels indicated as RQ values normalized to an endogenous GAPDH control and relative to normal B (NB) cells from peripheral blood. Bars represent mean  $\pm$  SE of replicate samples. Results are representative of 3 independent experiments for each sample.

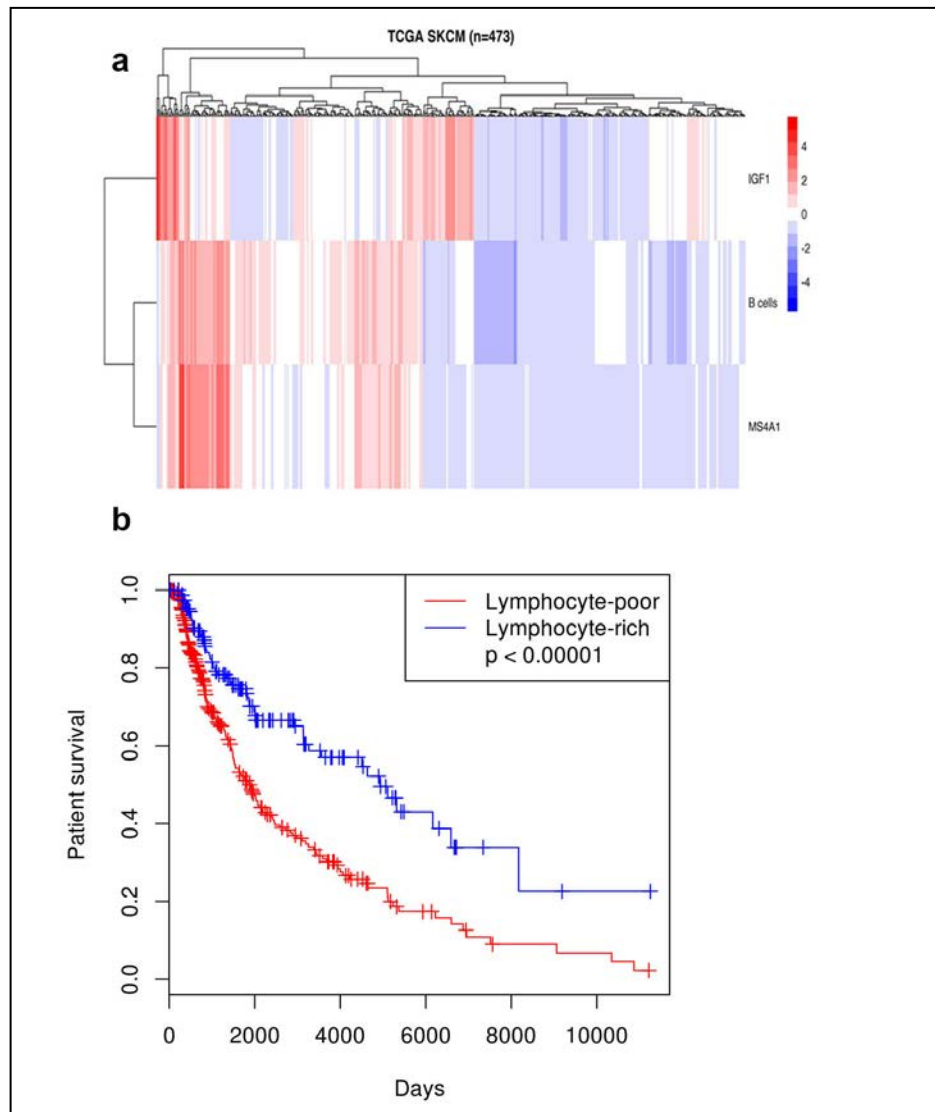

**Supplementary Figure 2. TCGA melanoma patients' data set analyses; a lymphocyte-expression signature with clinical significance in melanomas. (a)** The heat map of the TCGA data set (n=473) showing clustering of *IGF1* with B cells and *MS4A1* genes. **(b)** Kaplan-Meier survival curves of melanoma patients who were divided into high and low expression for lymphocyte markers CD4, CD8, and CD20 (by median, see Methods). Log-rank test shows a favorable OS in melanoma patients with tumors containing a high lymphocyte infiltrate.

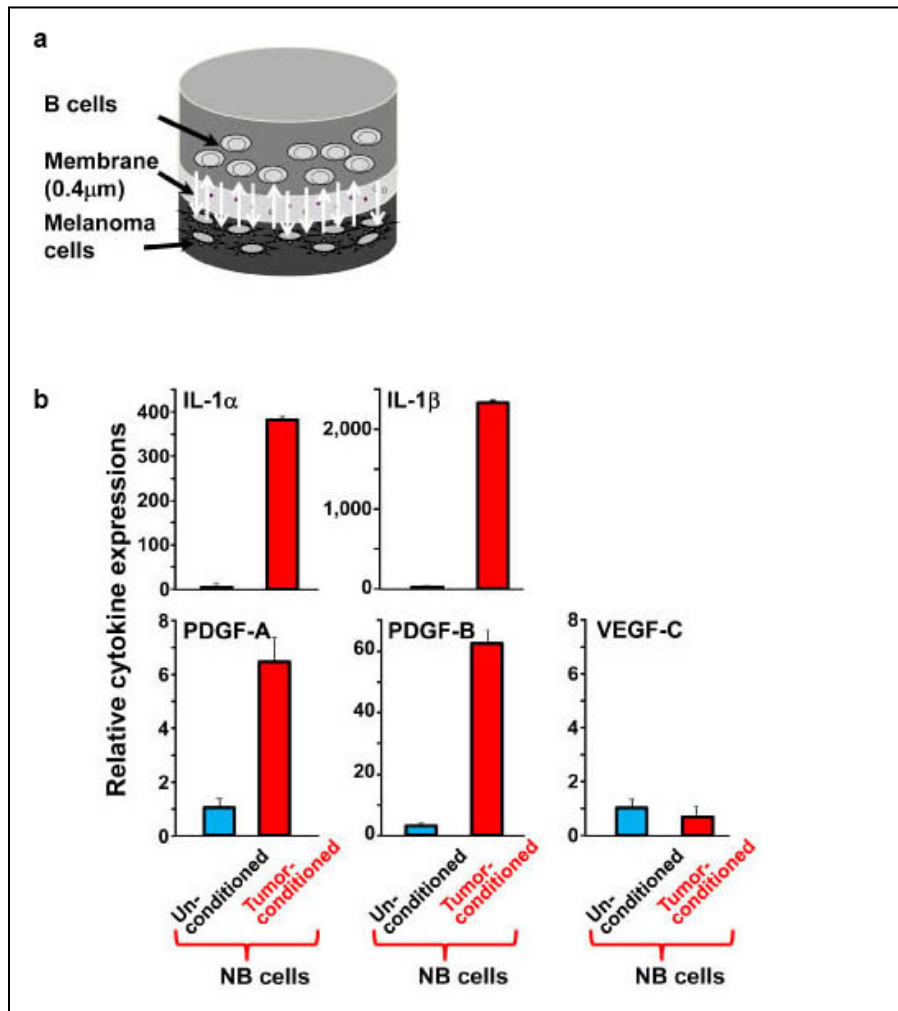

**Supplementary Figure 3. (a) Culture schema:** Melanoma cells (bottom chamber) were co-cultured with B-cells (either NB or TAB cells; top chamber) in a transwell plate (separated with a membrane [0.4  $\mu$ m] pore size that allows only soluble growth factor permeability) for 5-14 days. B-cells or tumor cells were then harvested and used for various assays. **(b) Tumor-conditioned normal B-cells show increased inflammatory cytokine expression.** NB-cells co-cultured with tumor (WM3749; tumor-conditioned; **red bars**) show increased expression of cytokines including IL-1 $\alpha$ , IL-1 $\beta$ , PDGF-A and PDGF-B compared to unconditioned NB-cells from the same healthy volunteer (**blue bars**). NB-cells were harvested after 14 days of co-culture and analyzed by qPCR as described in Fig. 1D. Results are representative of 2 independent experiments.

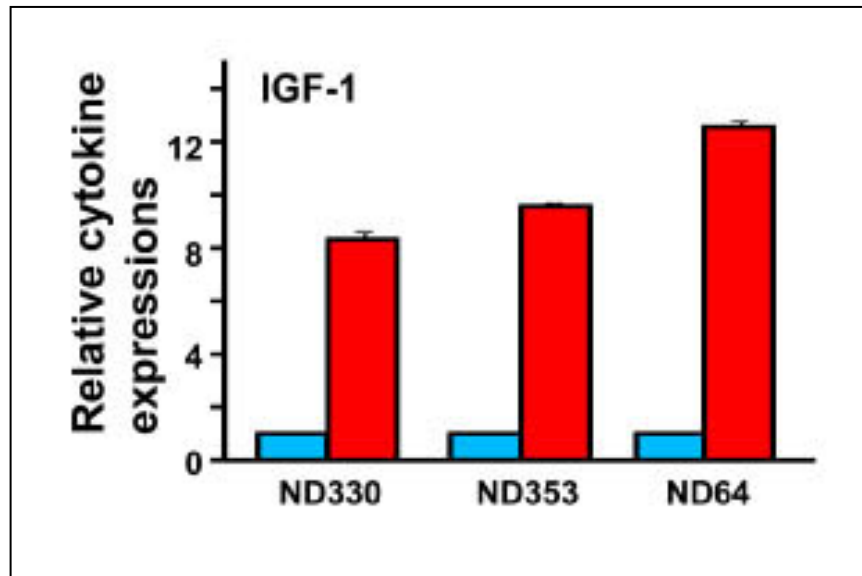

**Supplementary Figure 4. Tumor-conditioned fresh NB-cells show increased IGF-1 expression.** Non-immortalized B-cells isolated by negative selection by using anti-CD3/anti-CD146 coupled beads from peripheral blood and co-cultured with melanoma tumor cells (WM3749; tumor-conditioned; **red bars**) show increased expression of IGF-1 when compared to unconditioned fresh NB-cells from the same healthy volunteer (**blue bars**). As non-immortalized B-cells were short lived they were harvested based on cell viability (>90%; days 7-10 and analyzed by qPCR as described in Fig. 1D).

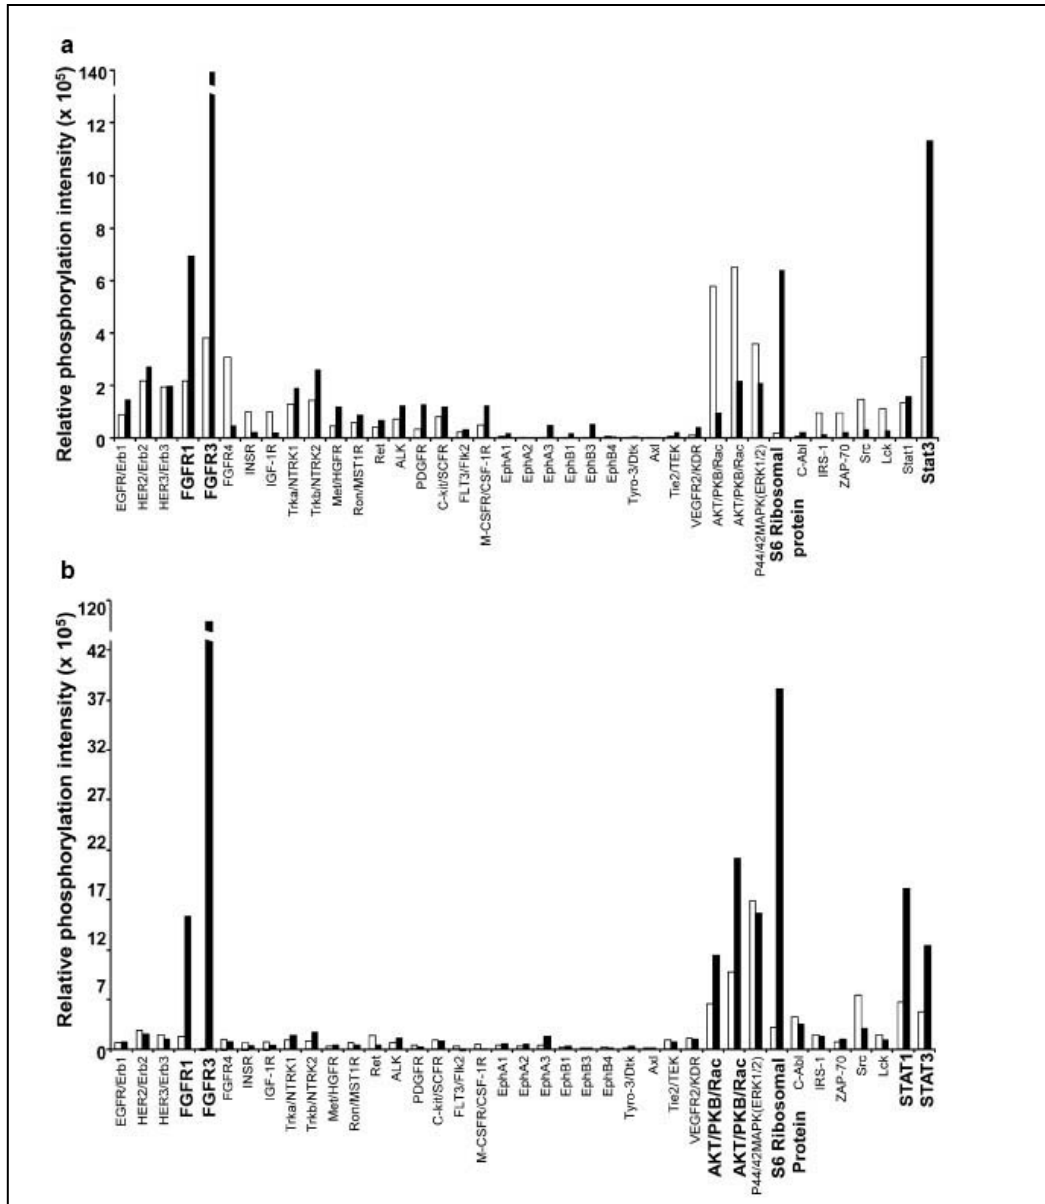

**Supplementary Figure 5. Phospho-RTK array analyses of B-cells co-cultured with melanomas show increased phospho-signaling of FGFR-1, FGFR-3, S6 Ribosomal protein and STAT3. (a)** Cell lysates from tumor-conditioned NB-cells (**black bars**) show increased phospho-signaling of FGFR-1, FGFR-3, S6 Ribosomal protein and STAT3 compared to unconditioned NB-cells (**open bars**) as determined by phospho-RTK array analysis at 48h. **(b)** As in (A), cell lysates of tumor-conditioned TAB-cells (black bars) show increased phospho-signaling of FGFR-1, FGFR-3, AKT/PKB/Rac, S6 Ribosomal protein, STAT1 and STAT3 compared to control unconditioned TAB-cells (**open bars**) at 48h.

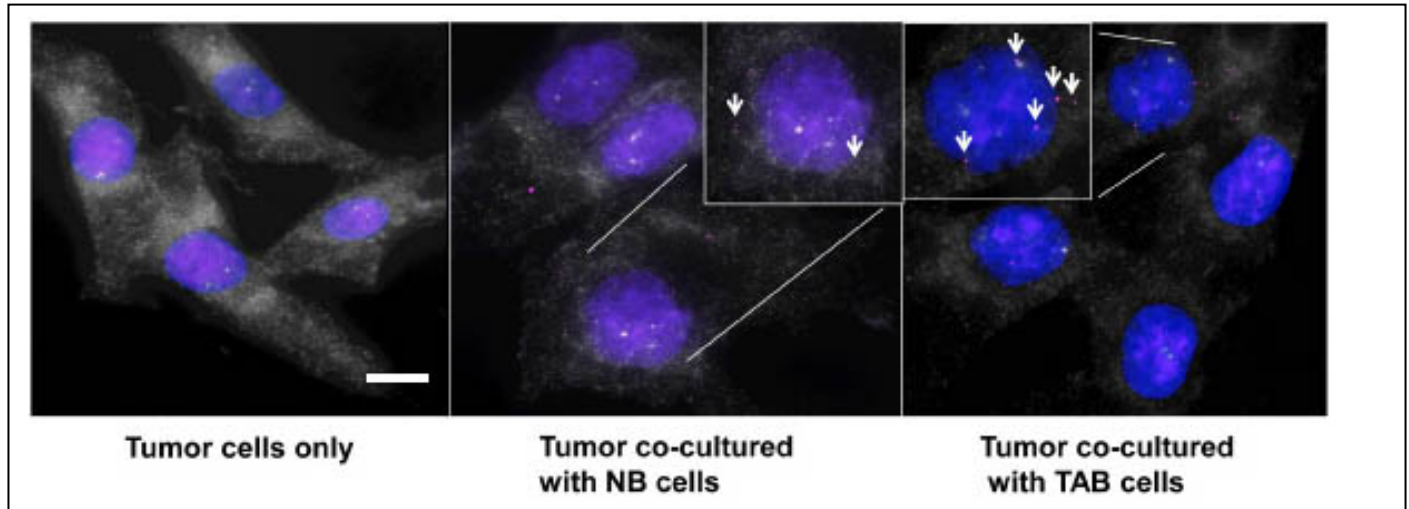

**Supplementary Figure 6. Melanoma cells after co-culture with B-cells showed increased FGFR-3 expression.** Melanoma cells (WM3749) grown in chamber slides in the presence of TAB-cells (**right panel**) show increased FGFR-3 transcripts (**white arrows**) at the single cell level as detected by custom made FGFR-3 fluorescent probes when compared to tumor cells either cultured alone (**left panel**) or cultured in the presence of NB-cells (**middle panel**). Nuclei are stained with DAPI. Scale bars: 10  $\mu\text{m}$ .



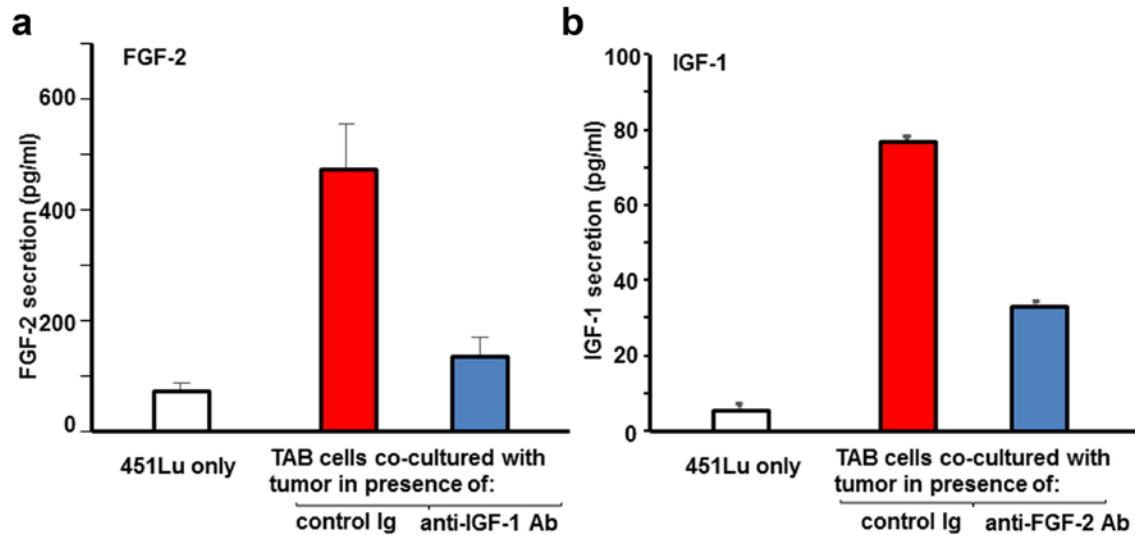

**Supplementary Figure 7. Inhibition of FGF-2 and IGF-1 in melanoma-TAB cell co-cultures in presence of anti-IGF-1 and anti-FGF-2 neutralizing antibodies.** (a) Melanoma cells (451Lu) co-cultured (72h) with TAB-cells in the presence of an anti-IGF-1 neutralizing antibody (10  $\mu\text{g/ml}$ ) show decreased FGF-2 secretion in culture supernatants (**blue bar**) when compared to cultures in presence of control antibody (**red bar**). (b) TAB-cells co-cultured (72h) with melanoma cells (451Lu) in the presence of an anti-FGF-2 neutralizing antibody (1  $\mu\text{g/ml}$ ) show decreased IGF-1 secretion in culture supernatants (**blue bar**) when compared to cultures in presence of control antibody (**red bar**). FGF-2 and IGF-1 protein expressions was determined by using an ELISA kit. Bars represent mean  $\pm$  SE of triplicate samples.

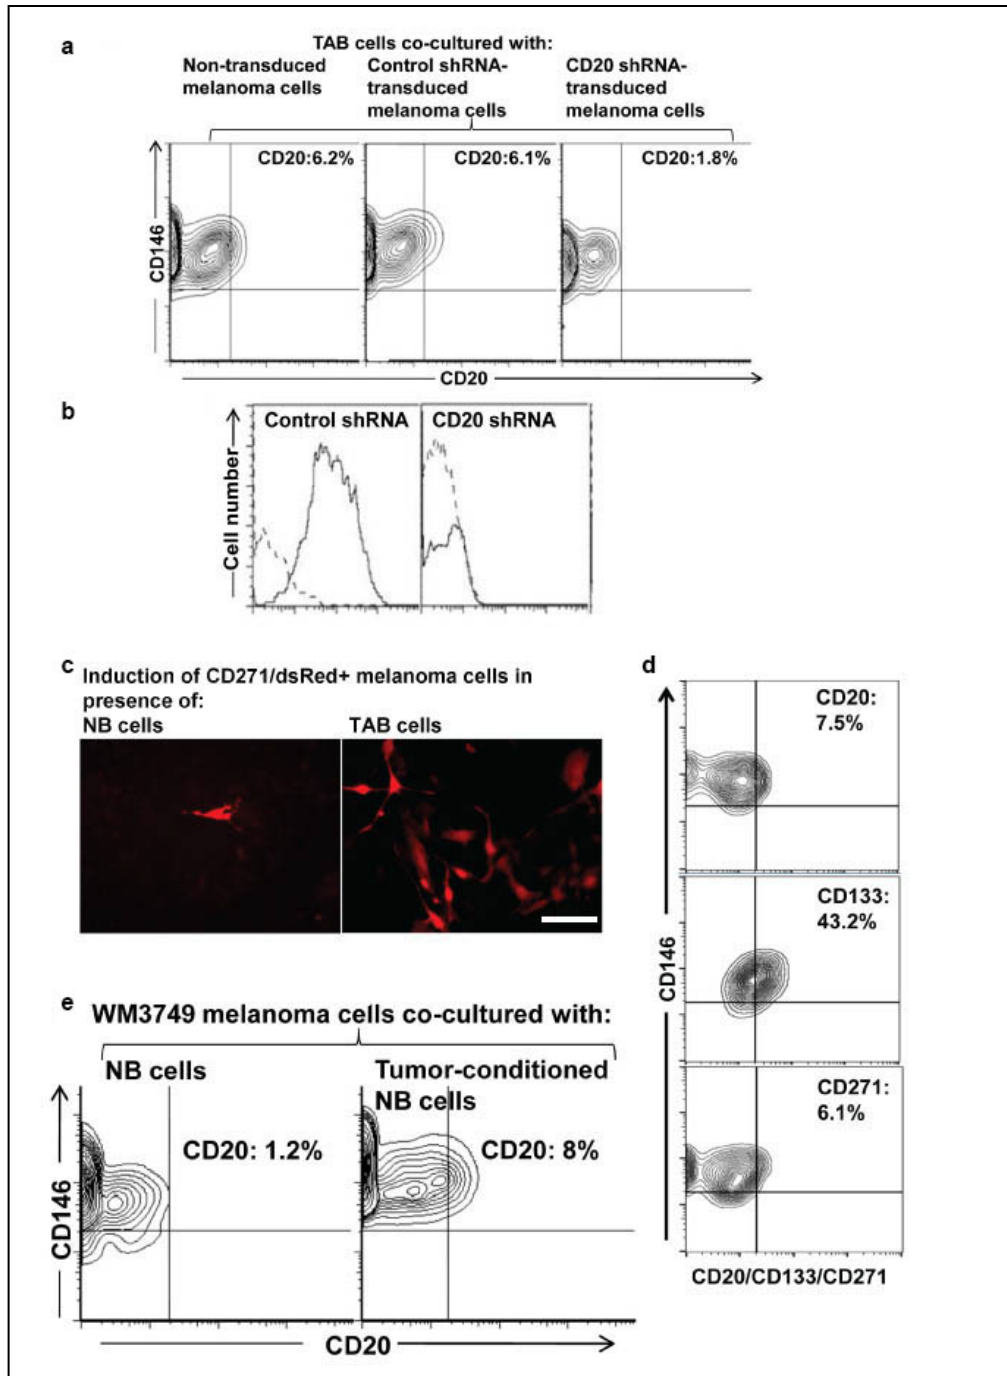

**Supplementary Figure 8. Induction of CD20, CD133 or CD271 in melanoma cells after co-culture with B-cells.** (a) Induction of CD20 in melanoma cells by co-cultured TAB-cells (day 6; see Fig. 4B) is blocked when melanoma cells (WM3749) are transduced with CD20 shRNA. Induction of CD20 in melanoma cells is not blocked in non-transduced melanoma cells or melanoma cells transduced with control shRNA, FACS assay, melanoma cell staining for CD146 (MCAM) (b) Validation of the CD20 shRNA clone: Minimal

CD20 expression of normal B-cells after transduction with CD20 shRNA, FACS assay. **(c)** Induction of CD271 upon co-culture with TAB-cells in melanoma cells transduced with a CD271/dsRed promoter construct (right). Minimal induction of CD271 was seen in melanoma cells co-cultured with un-conditioned NB-cells (left). Scale bars: 100  $\mu\text{m}$ . **(d)** Unlike neutralizing anti-IGF-1 antibody, control mouse Ig is unable to block CD20, CD133 or CD271 expression in melanoma cells upon co-culture with TAB-cells (see Fig. 4B). **(e)** Tumor-conditioned NB-cells (see Fig. 2) up-regulated CD20 expression in melanoma cells after co-culture (day 6) as determined by FACS assay. Unconditioned normal B-cells had a minimal effect on CD20 expression in tumor cells.

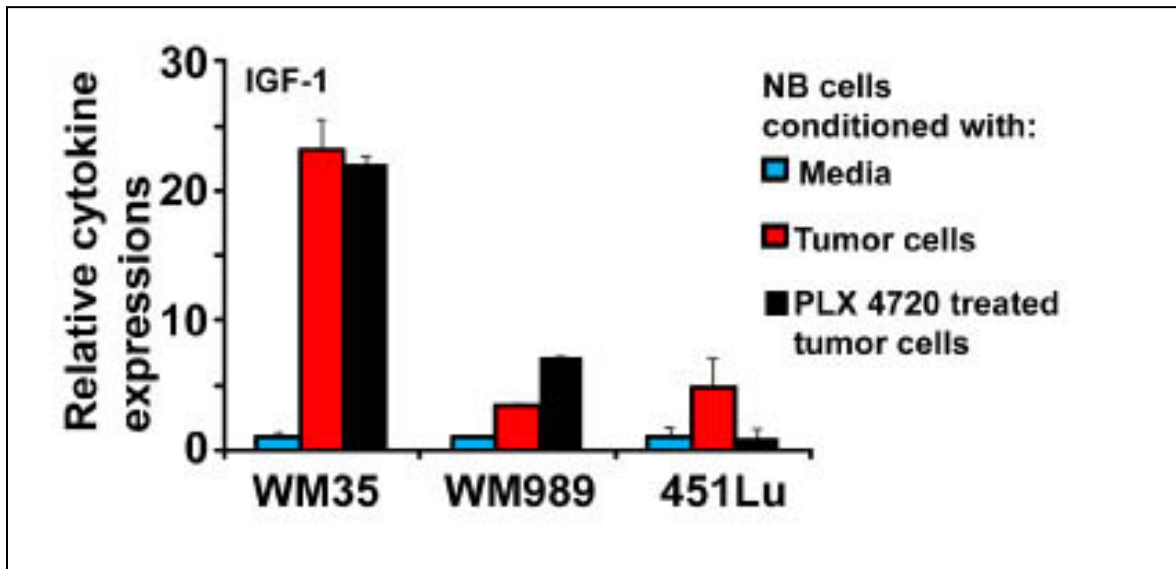

**Supplementary Figure 9. BRAFi-treated tumor cells can preserve their ability to induce IGF-1 in B-cells.** NB-cells were co-cultured with either medium alone (**blue bars**) or with melanoma cells that had received no treatment (**red bars**) or treatment with BRAF inhibitor (1 $\mu$ M PLX4720 for 72h; **black bars**). NB cells were harvested and analyzed for IGF-1 expression by qPCR as described in Fig. 1D. Bars represent mean  $\pm$  SE of duplicate samples. Results are representative of 2 independent experiments.

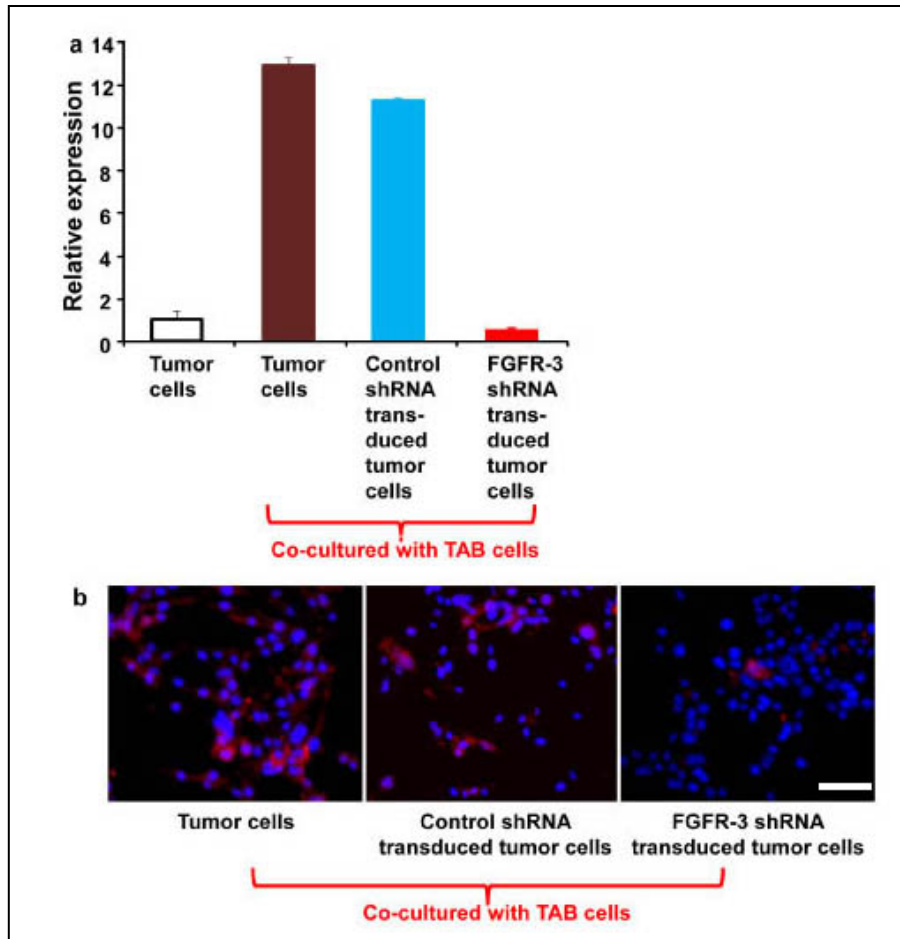

**Supplementary Figure 10. Validation of FGFR-3 shRNA clone.** (a) Melanoma cells (451Lu) transduced with FGFR-3 shRNA show minimal expression of FGFR-3 after co-culture (48h) with TAB-cells as compared to un-transduced or control shRNA-transduced co-cultured melanoma cells as determined by qPCR (Bars represent mean  $\pm$  SE of duplicate samples) or (b) by immunofluorescence assay as in Fig 3C. Scale bars: 100  $\mu$ m.



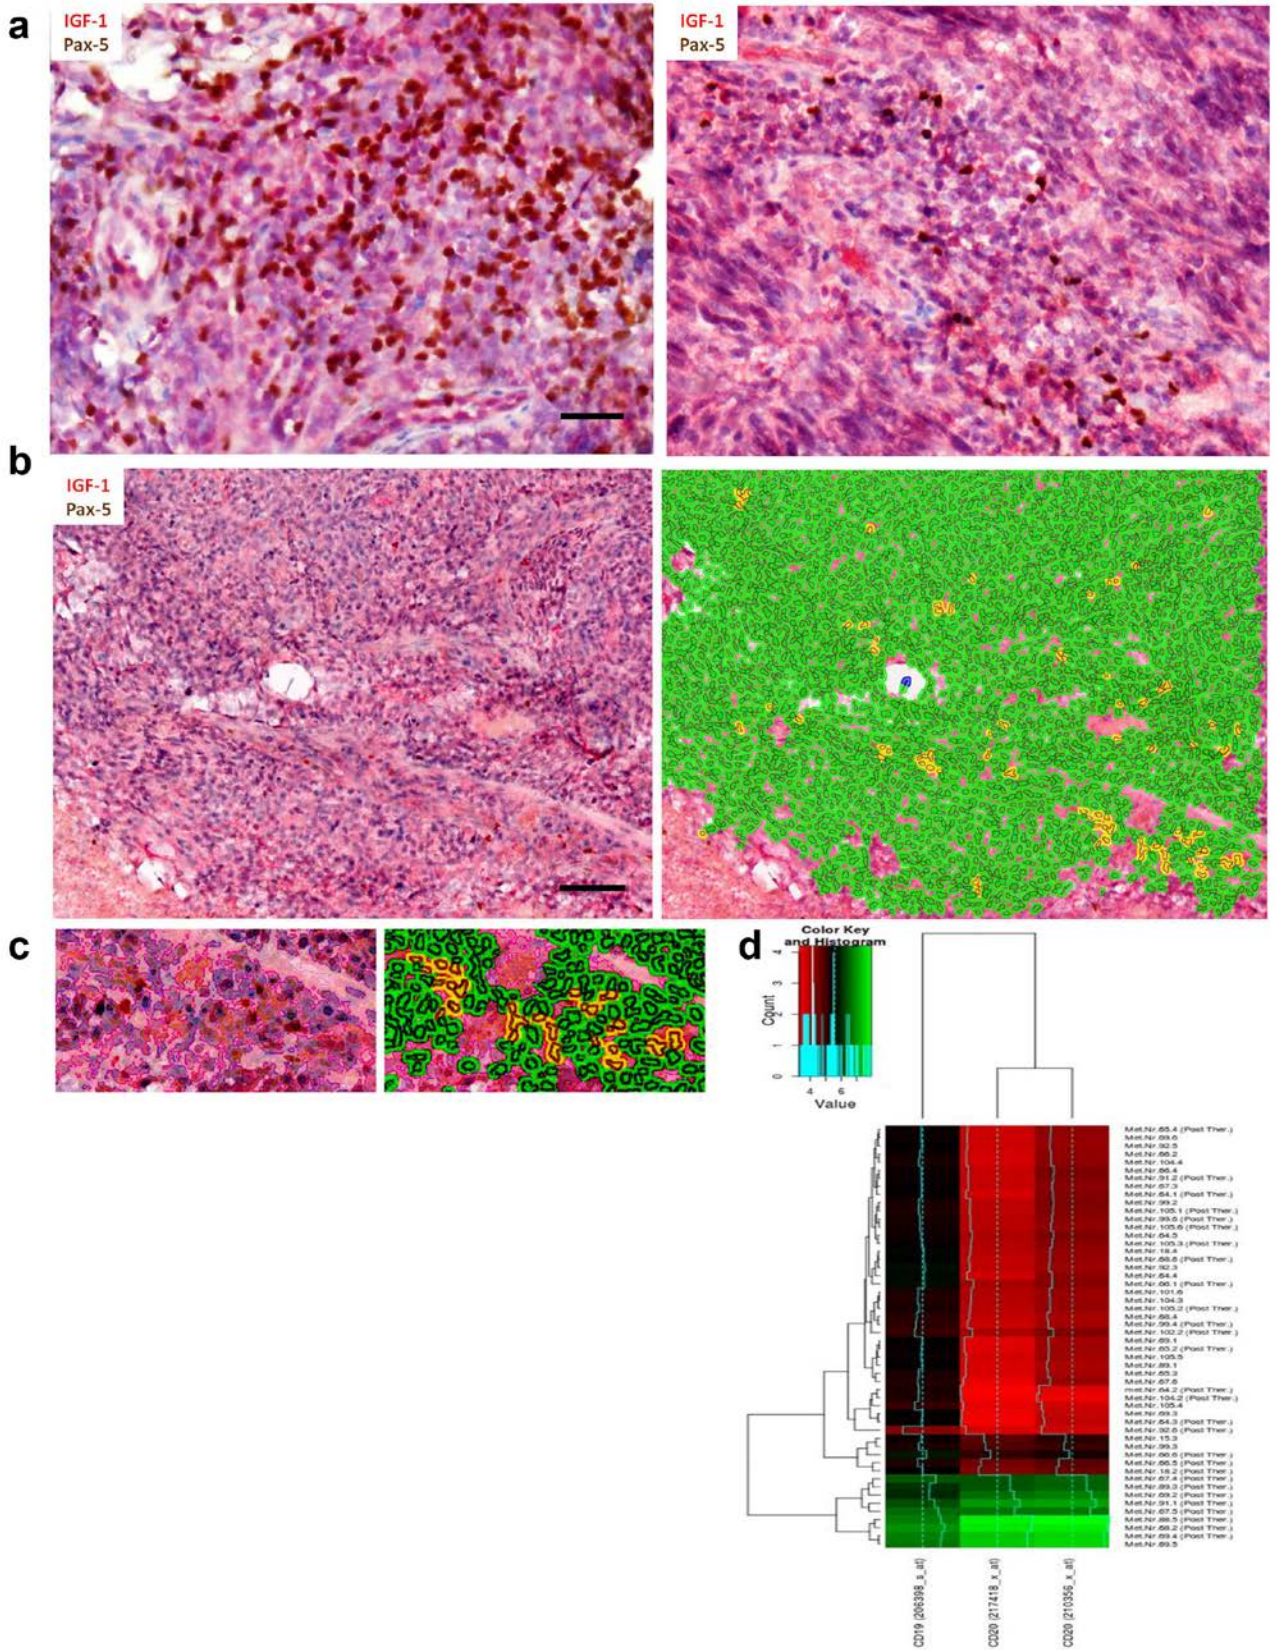

**Supplementary Figure 11. Increased presence of PAX5<sup>+</sup> B-cells co-stained with IGF-1 in tumor sections obtained from patients undergoing treatment with a combination of BRAF and MEK inhibitors. (a-c)** Representative immunostaining of three patients undergoing treatment showing co-staining of IGF-1 (**red**) and PAX5 (B-cell transcription factor nuclear staining; **dark brown**; 400x magnification for top panels, scale bars: 25  $\mu$ m. **(a)** and 100x magnification for bottom panels, scale bars: 100  $\mu$ m. **(b)**. Multi-spectral analysis confirming the co-localization of IGF-1 and PAX5<sup>+</sup> B-cells is shown in the bottom right panel (**yellow**). None of the pre-therapy sections showed PAX5<sup>+</sup> B-cells (data not shown). **(c)** Magnified view of the co-staining is shown on the middle left and multi-spectral analysis confirming the co-localization of IGF-1 and CD20<sup>+</sup> B-cells is shown in **middle right panel (yellow)**. Co-localization of IGF-1 (**red**) and Pax5<sup>+</sup> B-cells (**dark brown**) is shown in the lower left panel, the corresponding multi-spectral analysis confirming their co-localization (**yellow**) on the lower right. **(d) Increased *MS4A1* and CD19 expression in a subgroup of tumor biopsies.** Increased *MS4A1* (encoding CD20) along with CD19 gene expression in tumor biopsies of melanoma patients (n=52) who were untreated or had developed resistance to diverse type of therapies including chemo-, radiation- and immune-therapies (Post Treat.). Note enrichment of CD20/CD19 high expressor samples for therapy-resistant samples (Post Treat.). Gene expression analysis was performed using GEO dataset ([GSE8401](#)).

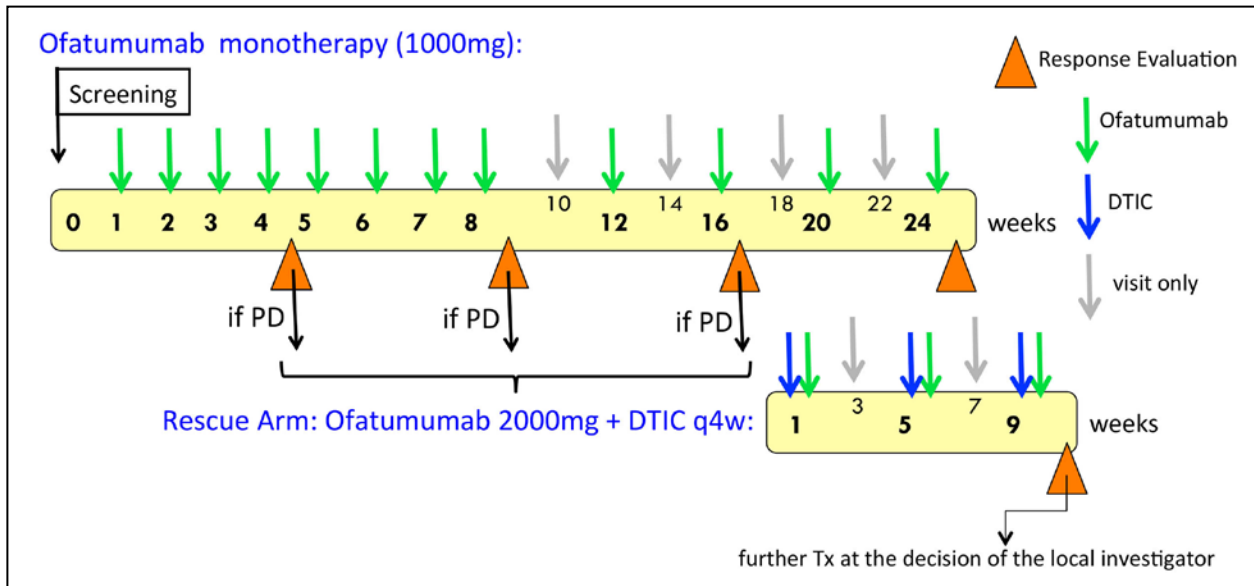

**Supplementary Figure 12. Clinical pilot trial design.** Ten eligible patients were treated with ofatumumab (1000 mg) alone. Tumor imaging was performed at wk 4 (screening for rapid disease progression), 8, 16 and 24. Follow-up started at wk 24. Note that all clinical data are reported for treatment with ofatumumab alone. Rescue arm: if ofatumumab alone at the 1000 mg dose was well tolerated, patients with disease progression had the opportunity to receive at least 3 cycles of ofatumumab q4w at an increased dose of 2000 mg in combination with dacarbazine (DTIC).



**Supplementary Table 1**

B-cell signature genes.

---

| Cell Type | B-cell signature genes                                                                                                                                                                                                                      |
|-----------|---------------------------------------------------------------------------------------------------------------------------------------------------------------------------------------------------------------------------------------------|
| B cells   | <i>ABCB4, BACH2, BCL11A, BLK, BLNK, CCR9, CD19, CD72, COCH, CR2, DTNB, FCRL2, GLDC, GNG7, HLA-DOB, HLA-DQA1, IGHA1, IGHG1, IGHM, IGKC, IGL, KIAA0125, MEF2C, MICAL3, MS4A1, OSBPL10, PNOC, QRSL1, SCN3A, SLC15A2, SPIB, TCLIA, TNFRSF17</i> |

---

**Supplementary Table 2**

Patient, treatment and therapy response.

| Patient number | Treatment              | Response    | Time to progression (months)             |
|----------------|------------------------|-------------|------------------------------------------|
| 2              | Vemurafenib            | PR (-60.5%) | 8.5                                      |
| 4              | Vemurafenib            | PR (-56%)   | 3.5                                      |
| 5              | Vemurafenib            | SD (-27%)   | 6.5                                      |
| 6              | Dabrafenib +trametinib | PR (-59.9%) | 21                                       |
| 7              | Dabrafenib +trametinib | CR (100%)   | 17, ongoing 47 months                    |
| 9              | Dabrafenib +trametinib | PR (-45%)   | 7                                        |
| 10             | Dabrafenib +trametinib | SD (-13%)   | 3                                        |
| 11             | Dabrafenib +trametinib | PR (-80%)   | 10                                       |
| 12             | Dabrafenib +trametinib | PR (-88.9%) | 12, stopped at 20 months                 |
| 13             | Dabrafenib +trametinib | PR (-57.9%) | 9, stroke                                |
| 16             | Dabrafenib +trametinib | SD (-19.5%) | 11                                       |
| 20             | Vemurafenib            | PR (-57.9%) | 5                                        |
| 24             | Dabrafenib +trametinib | SD (-19.5%) | 11                                       |
| 25             | Dabrafenib +trametinib | SD (-19.5%) | 11                                       |
| 34             | LGX8181+MEK162         | PR (-48.6%) | Stopped after 14 months, PD at 15 months |
| 35             | LGX8181+MEK162         | SD (-22.8%) | Stopped after 7 months, PD at 10 months  |
| 38             | Vemurafenib            | SD (-24.9%) | 4.3                                      |
| 40             | Vemurafenib            | SD (-19.5%) | Stopped after 7 months, PD at 10 months  |
| 42             | LGX8181 +MEK162        | SD (-19.5%) | 13                                       |
| 43             | Vemurafenib            | PR (-57.9%) | 13.4                                     |

All patients are BRAFV600E mutation positive.

CR: complete response, PR: partial response, PD: progressive disease, SD: Stable disease.

**Supplementary Table 3.**

The percentage of tumor area that shows CD20<sup>+</sup> B cell infiltration in IHC staining of melanoma tissues from patients with increased FGFR3 expression in progression biopsies (from GEO dataset [GSE50509](#))

| Patient number | Disease status             | Peritumoral CD20    |                      | Intratumoral CD20   |                      |
|----------------|----------------------------|---------------------|----------------------|---------------------|----------------------|
|                |                            | % area <sup>a</sup> | Density <sup>a</sup> | % area <sup>a</sup> | Density <sup>a</sup> |
| 3              | Pre                        | 5                   | 3                    | 5                   | 3                    |
|                | Progression 1 <sup>b</sup> | 2                   | 2                    | 2                   | 2                    |
|                | Progression 2              | 2                   | 2                    | 2                   | 2                    |
| 7              | EDT <sup>c</sup>           | 5                   | 1                    | 5                   | 1                    |
|                | Progression                | 5                   | 2                    | 1                   | 1                    |
| 10             | Pre                        | No tumor            | -                    | 1                   | 1                    |
|                | EDT                        | 1                   | 1                    | 1                   | 1                    |
|                | Progression                | 5                   | 2                    | 1                   | 1                    |
| 11             | Pre                        | 20                  | 1                    | 30                  | 2                    |
|                | Progression 1              | NA <sup>d</sup>     | NA                   | 5                   | 2                    |
|                | Progression 2              | NA                  | NA                   | 1                   | 1                    |
| 14             | Pre                        | NA                  | NA                   | 1                   | 1                    |
|                | Progression                | 0                   | 0                    | 1                   | 1                    |
| 18             | Pre                        | 20                  | 2                    | 2                   | 2                    |
|                | Progression 1              | 3                   | 2                    | 0                   | 0                    |
|                | Progression 2              | 1                   | 1                    | 1                   | 1                    |
| 21             | Pre                        | 5                   | 2                    | 2                   | 2                    |
|                | Progression                | 5                   | 2                    | 20                  | 1                    |

<sup>a</sup> Score from 0= no lymphocytes, 1= 1-10/high magnification field (HPF), 2=11-50 HPF, 3≥50 HPF.

<sup>b</sup>Melanoma patients resistant to BRAF inhibitor therapy drug Dabrafenib.

<sup>c</sup>EDT: early during treatment.

<sup>d</sup>NA: Not assessable.

## Supplementary Table 4.

### Baseline patients' demographic and clinical characteristics

| Patient | Age (years),<br>gender | ECOG performance status | TNM (AJCC 2009) | Metastasis      |                                             | Prior therapies                                                                     |
|---------|------------------------|-------------------------|-----------------|-----------------|---------------------------------------------|-------------------------------------------------------------------------------------|
|         |                        |                         |                 | Number of sites | Sites                                       |                                                                                     |
| 1       | 35, m                  | 0                       | M1c             | 5               | Skin, subcutaneous, lymph node, lung, liver | Surgery, IFN, ipilimumab                                                            |
| 2       | 48, m                  | 1                       | M1b             | 4               | Skin, subcutaneous, lymph node, lung        | Surgery, IFN, dacarbazine, ipilimumab                                               |
| 3       | 72, m                  | 0                       | M1c             | 4               | Subcutaneous, lymph node, lung, liver       | Surgery, dacarbazine                                                                |
| 4       | 53, f                  | 0                       | M1c             | 5               | Soft tissue, lymph node, lung, liver, bone  | Surgery, vemurafenib, ipilimumab                                                    |
| 5       | 68, m                  | 0                       | M1c             | 2               | Skin, soft tissue                           | Surgery, dacarbazine, fotemustine, radiotherapy, carboplatin/paclitaxel, ipilimumab |
| 6       | 51, m                  | 0                       | M1b             | 4               | Skin, subcutaneous, lymph node, lung        | Surgery                                                                             |
| 7       | 32, f                  | 0                       | M1a             | 3               | Skin, subcutaneous, lymph node              | Surgery, paclitaxel, cisplatin, vemurafenib, ipilimumab                             |
| 8       | 66, m                  | 0                       | M1c             | 3               | Lung, liver, bone                           | Surgery, IFN, IL-2, ipilimumab, radiotherapy, fotemustine, carboplatin/paclitaxel   |
| 9       | 71, m                  | 0                       | M1c             | 4               | Skin, subcutaneous, lymph node, liver       | Surgery, IFN                                                                        |
| 10      | 72, m                  | 0                       | M1c             | 4               | Lymph node, lung, liver, bone               | Surgery, IFN, dacarbazine, IL-2, ipilimumab                                         |

Abbrev.: M1a, distant skin, subcutaneous, or nodal metastases; M1b, lung metastases; M1c, all other visceral metastases.

**Supplementary Table 5.**

**Tumor Measurements (measurable disease, all patients)**

| <b>Best Response (ITT analysis)</b>                                      | <b>Ofatumumab<br/>(n=10, %)</b> |
|--------------------------------------------------------------------------|---------------------------------|
| <b>Complete response (CR)</b>                                            | 0                               |
| <b>Partial response (PR, confirmed)</b>                                  | 1 (10)                          |
| <b>Stable Disease (SD)</b>                                               | 5 (50)                          |
| <b>with Tumor mass decrease<br/>by RECIST v.1.1/irRC</b>                 | 4/5 (80)                        |
| <b>Disease control<br/>(CR+PR+SD)</b>                                    | 6 (60)                          |
| <b>Progressive disease (PD)</b>                                          | 4 (40)                          |
| <b>with Induction of<br/>necrotic tumor mass<br/>or reduction of SUV</b> | 2/4 (50)                        |
